# Supplementary material for: The Inactivation of Enzymes Belonging to the Central Carbon Metabolism Is a Novel Mechanism of Developing Antibiotic Resistance
Source: mSystems. 2020 Jun 2;5(3):e00282-20. doi: 10.1128/mSystems.00282-20 (PMC8534728; doi:10.1128/mSystems.00282-20)
Supplement: FIG S2 [file msystems.00282-20-sf002.pdf]

[illegible]

[illegible]





## Phosphoglycerate kinase

|                       |                                                             |                           |                                                          |
|-----------------------|-------------------------------------------------------------|---------------------------|----------------------------------------------------------|
| Vascular ulcer        | MSIVMTDLDLSGKRVLRQDLNVPINENRITSEQRITASLPTLKLALBGAAMVVTSHL   | 60 Vascular ulcer         | GRPEGVNSEADSLAPVAQRLSELLGHEVPLVRHDVGDVQPGQVLLENCRMNVGEGK |
| Urine3                | MSIVMTDLDLSGKRVLRQDLNVPINENRITSEQRITASLPTLKLALBGAAMVVTSHL   | 60 Urine3                 | GRPEGVNSEADSLAPVAQRLSELLGHEVPLVRHDVGDVQPGQVLLENCRMNVGEGK |
| Urine2                | MSIVMTDLDLSGKRVLRQDLNVPINENRITSEQRITASLPTLKLALBGAAMVVTSHL   | 60 Urine2                 | GRPEGVNSEADSLAPVAQRLSELLGHEVPLVRHDVGDVQPGQVLLENCRMNVGEGK |
| Urine1                | MSIVMTDLDLSGKRVLRQDLNVPINENRITSEQRITASLPTLKLALBGAAMVVTSHL   | 60 Urine1                 | GRPEGVNSEADSLAPVAQRLSELLGHEVPLVRHDVGDVQPGQVLLENCRMNVGEGK |
| Throat (pharynx)      | MSIVMTDLDLSGKRVLRQDLNVPINENRITSEQRITASLPTLKLALBGAAMVVTSHL   | 60 Throat (pharynx)       | GRPEGVNSEADSLAPVAQRLSELLGHEVPLVRHDVGDVQPGQVLLENCRMNVGEGK |
| Tracheal_aspirate     | MSIVMTDLDLSGKRVLRQDLNVPINENRITSEQRITASLPTLKLALBGAAMVVTSHL   | 60 Tracheal_aspirate      | GRPEGVNSEADSLAPVAQRLSELLGHEVPLVRHDVGDVQPGQVLLENCRMNVGEGK |
| Sputum3               | MSIVMTDLDLSGKRVLRQDLNVPINENRITSEQRITASLPTLKLALBGAAMVVTSHL   | 60 Sputum3                | GRPEGVNSEADSLAPVAQRLSELLGHEVPLVRHDVGDVQPGQVLLENCRMNVGEGK |
| Sputum2               | MSIVMTDLDLSGKRVLRQDLNVPINENRITSEQRITASLPTLKLALBGAAMVVTSHL   | 60 Sputum2                | GRPEGVNSEADSLAPVAQRLSELLGHEVPLVRHDVGDVQPGQVLLENCRMNVGEGK |
| Rectal_swab2          | MSIVMTDLDLSGKRVLRQDLNVPINENRITSEQRITASLPTLKLALBGAAMVVTSHL   | 60 Rectal_swab2           | GRPEGVNSEADSLAPVAQRLSELLGHEVPLVRHDVGDVQPGQVLLENCRMNVGEGK |
| Rectal_swab1          | MSIVMTDLDLSGKRVLRQDLNVPINENRITSEQRITASLPTLKLALBGAAMVVTSHL   | 60 Rectal_swab1           | GRPEGVNSEADSLAPVAQRLSELLGHEVPLVRHDVGDVQPGQVLLENCRMNVGEGK |
| Pus2                  | MSIVMTDLDLSGKRVLRQDLNVPINENRITSEQRITASLPTLKLALBGAAMVVTSHL   | 60 Pus2                   | GRPEGVNSEADSLAPVAQRLSELLGHEVPLVRHDVGDVQPGQVLLENCRMNVGEGK |
| Pus1                  | MSIVMTDLDLSGKRVLRQDLNVPINENRITSEQRITASLPTLKLALBGAAMVVTSHL   | 60 Pus1                   | GRPEGVNSEADSLAPVAQRLSELLGHEVPLVRHDVGDVQPGQVLLENCRMNVGEGK |
| Perineum              | MSIVMTDLDLSGKRVLRQDLNVPINENRITSEQRITASLPTLKLALBGAAMVVTSHL   | 60 Perineum               | GRPEGVNSEADSLAPVAQRLSELLGHEVPLVRHDVGDVQPGQVLLENCRMNVGEGK |
| Oropharynx            | MSIVMTDLDLSGKRVLRQDLNVPINENRITSEQRITASLPTLKLALBGAAMVVTSHL   | 60 Oropharynx             | GRPEGVNSEADSLAPVAQRLSELLGHEVPLVRHDVGDVQPGQVLLENCRMNVGEGK |
| Oropharyngeal_swab    | MSIVMTDLDLSGKRVLRQDLNVPINENRITSEQRITASLPTLKLALBGAAMVVTSHL   | 60 Oropharyngeal_swab     | GRPEGVNSEADSLAPVAQRLSELLGHEVPLVRHDVGDVQPGQVLLENCRMNVGEGK |
| Mouth                 | MSIVMTDLDLSGKRVLRQDLNVPINENRITSEQRITASLPTLKLALBGAAMVVTSHL   | 60 Mouth                  | GRPEGVNSEADSLAPVAQRLSELLGHEVPLVRHDVGDVQPGQVLLENCRMNVGEGK |
| Lung_cystic_fibrosisC | MSIVMTDLDLSGKRVLRQDLNVPINENRITSEQRITASLPTLKLALBGAAMVVTSHL   | 60 Lung_cystic_fibrosisC  | GRPEGVNSEADSLAPVAQRLSELLGHEVPLVRHDVGDVQPGQVLLENCRMNVGEGK |
| Lung_cystic_fibrosisB | MSIVMTDLDLSGKRVLRQDLNVPINENRITSEQRITASLPTLKLALBGAAMVVTSHL   | 60 Lung_cystic_fibrosisB  | GRPEGVNSEADSLAPVAQRLSELLGHEVPLVRHDVGDVQPGQVLLENCRMNVGEGK |
| Lung3                 | MSIVMTDLDLSGKRVLRQDLNVPINENRITSEQRITASLPTLKLALBGAAMVVTSHL   | 60 Lung3                  | GRPEGVNSEADSLAPVAQRLSELLGHEVPLVRHDVGDVQPGQVLLENCRMNVGEGK |
| Lung2                 | MSIVMTDLDLSGKRVLRQDLNVPINENRITSEQRITASLPTLKLALBGAAMVVTSHL   | 60 Lung2                  | GRPEGVNSEADSLAPVAQRLSELLGHEVPLVRHDVGDVQPGQVLLENCRMNVGEGK |
| Lung1                 | MSIVMTDLDLSGKRVLRQDLNVPINENRITSEQRITASLPTLKLALBGAAMVVTSHL   | 60 Lung1                  | GRPEGVNSEADSLAPVAQRLSELLGHEVPLVRHDVGDVQPGQVLLENCRMNVGEGK |
| Liver                 | MSIVMTDLDLSGKRVLRQDLNVPINENRITSEQRITASLPTLKLALBGAAMVVTSHL   | 60 Liver                  | GRPEGVNSEADSLAPVAQRLSELLGHEVPLVRHDVGDVQPGQVLLENCRMNVGEGK |
| Eye                   | MSIVMTDLDLSGKRVLRQDLNVPINENRITSEQRITASLPTLKLALBGAAMVVTSHL   | 60 Eye                    | GRPEGVNSEADSLAPVAQRLSELLGHEVPLVRHDVGDVQPGQVLLENCRMNVGEGK |
| Dentine_caries        | MSIVMTDLDLSGKRVLRQDLNVPINENRITSEQRITASLPTLKLALBGAAMVVTSHL   | 60 Dentine_caries         | GRPEGVNSEADSLAPVAQRLSELLGHEVPLVRHDVGDVQPGQVLLENCRMNVGEGK |
| Cerebrospinal_fluid3  | MSIVMTDLDLSGKRVLRQDLNVPINENRITSEQRITASLPTLKLALBGAAMVVTSHL   | 60 Cerebrospinal_fluid3   | GRPEGVNSEADSLAPVAQRLSELLGHEVPLVRHDVGDVQPGQVLLENCRMNVGEGK |
| Cerebrospinal_fluid1  | MSIVMTDLDLSGKRVLRQDLNVPINENRITSEQRITASLPTLKLALBGAAMVVTSHL   | 60 Cerebrospinal_fluid1   | GRPEGVNSEADSLAPVAQRLSELLGHEVPLVRHDVGDVQPGQVLLENCRMNVGEGK |
| Catheter              | MSIVMTDLDLSGKRVLRQDLNVPINENRITSEQRITASLPTLKLALBGAAMVVTSHL   | 60 Catheter               | GRPEGVNSEADSLAPVAQRLSELLGHEVPLVRHDVGDVQPGQVLLENCRMNVGEGK |
| Blood3                | MSIVMTDLDLSGKRVLRQDLNVPINENRITSEQRITASLPTLKLALBGAAMVVTSHL   | 60 Blood3                 | GRPEGVNSEADSLAPVAQRLSELLGHEVPLVRHDVGDVQPGQVLLENCRMNVGEGK |
| Blood2                | MSIVMTDLDLSGKRVLRQDLNVPINENRITSEQRITASLPTLKLALBGAAMVVTSHL   | 60 Blood2                 | GRPEGVNSEADSLAPVAQRLSELLGHEVPLVRHDVGDVQPGQVLLENCRMNVGEGK |
| Blood1                | MSIVMTDLDLSGKRVLRQDLNVPINENRITSEQRITASLPTLKLALBGAAMVVTSHL   | 60 Blood1                 | GRPEGVNSEADSLAPVAQRLSELLGHEVPLVRHDVGDVQPGQVLLENCRMNVGEGK |
| Acites                | MSIVMTDLDLSGKRVLRQDLNVPINENRITSEQRITASLPTLKLALBGAAMVVTSHL   | 60 Acites                 | GRPEGVNSEADSLAPVAQRLSELLGHEVPLVRHDVGDVQPGQVLLENCRMNVGEGK |
| D457                  | MSIVMTDLDLSGKRVLRQDLNVPINENRITSEQRITASLPTLKLALBGAAMVVTSHL   | 60 D457                   | GRPEGVNSEADSLAPVAQRLSELLGHEVPLVRHDVGDVQPGQVLLENCRMNVGEGK |
| FOS8                  | MSIVMTDLDLSGKRVLRQDLNVPINENRITSEQRITASLPTLKLALBGAAMVVTSHL   | 60 FOS8                   | GRPEGVNSEADSLAPVAQRLSELLGHEVPLVRHDVGDVQPGQVLLENCRMNVGEGK |
| Cerebrospinal_fluid2  | MSIVMTDLDLSGKRVLRQDLNVPINENRITSEQRITASLPTLKLALBGAAMVVTSHL   | 60 Cerebrospinal_fluid2   | GRPEGVNSEADSLAPVAQRLSELLGHEVPLVRHDVGDVQPGQVLLENCRMNVGEGK |
| Decubitus ulcer       | MSIVMTDLDLSGKRVLRQDLNVPINENRITSEQRITASLPTLKLALBGAAMVVTSHL   | 60 Decubitus ulcer        | GRPEGVNSEADSLAPVAQRLSELLGHEVPLVRHDVGDVQPGQVLLENCRMNVGEGK |
| Lung_cystic_fibrosisA | MSIVMTDLDLSGKRVLRQDLNVPINENRITSEQRITASLPTLKLALBGAAMVVTSHL   | 60 Lung_cystic_fibrosisA  | GRPEGVNSEADSLAPVAQRLSELLGHEVPLVRHDVGDVQPGQVLLENCRMNVGEGK |
| Rectal_swab3          | MSIVMTDLDLSGKRVLRQDLNVPINENRITSEQRITASLPTLKLALBGAAMVVTSHL   | 60 Rectal_swab3           | GRPEGVNSEADSLAPVAQRLSELLGHEVPLVRHDVGDVQPGQVLLENCRMNVGEGK |
| Sputum1               | MSIVMTDLDLSGKRVLRQDLNVPINENRITSEQRITASLPTLKLALBGAAMVVTSHL   | 60 Sputum1                | GRPEGVNSEADSLAPVAQRLSELLGHEVPLVRHDVGDVQPGQVLLENCRMNVGEGK |
| Intestine             | MSIVMTDLDLSGKRVLRQDLNVPINENRITSEQRITASLPTLKLALBGAAMVVTSHL   | 60 Intestine              | GRPEGVNSEADSLAPVAQRLSELLGHEVPLVRHDVGDVQPGQVLLENCRMNVGEGK |
| Gut1                  | MSIVMTDLDLSGKRVLRQDLNVPINENRITSEQRITASLPTLKLALBGAAMVVTSHL   | 60 Gut1                   | GRPEGVNSEADSLAPVAQRLSELLGHEVPLVRHDVGDVQPGQVLLENCRMNVGEGK |
| Gut2                  | MSIVMTDLDLSGKRVLRQDLNVPINENRITSEQRITASLPTLKLALBGAAMVVTSHL   | 60 Gut2                   | GRPEGVNSEADSLAPVAQRLSELLGHEVPLVRHDVGDVQPGQVLLENCRMNVGEGK |
| Vascular ulcer        | DEALSXKYAALCDVFNDAFGTAHQAQSTHGVIKFPAPVAAGGFLPMAELDALAQAALDA | 180 Vascular ulcer        | PAIPLLAIVAGSVKSTKLELANLVKRVQDLVGGGINTFIAAAGYVKGSLYEPDLLD |
| Urine3                | DEALSXKYAALCDVFNDAFGTAHQAQSTHGVIKFPAPVAAGGFLPMAELDALAQAALDA | 180 Urine3                | PAIPLLAIVAGSVKSTKLELANLVKRVQDLVGGGINTFIAAAGYVKGSLYEPDLLD |
| Urine2                | DEALSXKYAALCDVFNDAFGTAHQAQSTHGVIKFPAPVAAGGFLPMAELDALAQAALDA | 180 Urine2                | PAIPLLAIVAGSVKSTKLELANLVKRVQDLVGGGINTFIAAAGYVKGSLYEPDLLD |
| Urine1                | DEALSXKYAALCDVFNDAFGTAHQAQSTHGVIKFPAPVAAGGFLPMAELDALAQAALDA | 180 Urine1                | PAIPLLAIVAGSVKSTKLELANLVKRVQDLVGGGINTFIAAAGYVKGSLYEPDLLD |
| Throat (pharynx)      | DEALSXKYAALCDVFNDAFGTAHQAQSTHGVIKFPAPVAAGGFLPMAELDALAQAALDA | 180 Throat (pharynx)      | PAIPLLAIVAGSVKSTKLELANLVKRVQDLVGGGINTFIAAAGYVKGSLYEPDLLD |
| Tracheal_aspirate     | DEALSXKYAALCDVFNDAFGTAHQAQSTHGVIKFPAPVAAGGFLPMAELDALAQAALDA | 180 Tracheal_aspirate     | PAIPLLAIVAGSVKSTKLELANLVKRVQDLVGGGINTFIAAAGYVKGSLYEPDLLD |
| Sputum3               | DEALSXKYAALCDVFNDAFGTAHQAQSTHGVIKFPAPVAAGGFLPMAELDALAQAALDA | 180 Sputum3               | PAIPLLAIVAGSVKSTKLELANLVKRVQDLVGGGINTFIAAAGYVKGSLYEPDLLD |
| Sputum2               | DEALSXKYAALCDVFNDAFGTAHQAQSTHGVIKFPAPVAAGGFLPMAELDALAQAALDA | 180 Sputum2               | PAIPLLAIVAGSVKSTKLELANLVKRVQDLVGGGINTFIAAAGYVKGSLYEPDLLD |
| Rectal_swab2          | DEALSXKYAALCDVFNDAFGTAHQAQSTHGVIKFPAPVAAGGFLPMAELDALAQAALDA | 180 Rectal_swab2          | PAIPLLAIVAGSVKSTKLELANLVKRVQDLVGGGINTFIAAAGYVKGSLYEPDLLD |
| Rectal_swab1          | DEALSXKYAALCDVFNDAFGTAHQAQSTHGVIKFPAPVAAGGFLPMAELDALAQAALDA | 180 Rectal_swab1          | PAIPLLAIVAGSVKSTKLELANLVKRVQDLVGGGINTFIAAAGYVKGSLYEPDLLD |
| Pus2                  | DEALSXKYAALCDVFNDAFGTAHQAQSTHGVIKFPAPVAAGGFLPMAELDALAQAALDA | 180 Pus2                  | PAIPLLAIVAGSVKSTKLELANLVKRVQDLVGGGINTFIAAAGYVKGSLYEPDLLD |
| Pus1                  | DEALSXKYAALCDVFNDAFGTAHQAQSTHGVIKFPAPVAAGGFLPMAELDALAQAALDA | 180 Pus1                  | PAIPLLAIVAGSVKSTKLELANLVKRVQDLVGGGINTFIAAAGYVKGSLYEPDLLD |
| Perineum              | DEALSXKYAALCDVFNDAFGTAHQAQSTHGVIKFPAPVAAGGFLPMAELDALAQAALDA | 180 Perineum              | PAIPLLAIVAGSVKSTKLELANLVKRVQDLVGGGINTFIAAAGYVKGSLYEPDLLD |
| Oropharynx            | DEALSXKYAALCDVFNDAFGTAHQAQSTHGVIKFPAPVAAGGFLPMAELDALAQAALDA | 180 Oropharynx            | PAIPLLAIVAGSVKSTKLELANLVKRVQDLVGGGINTFIAAAGYVKGSLYEPDLLD |
| Oropharyngeal_swab    | DEALSXKYAALCDVFNDAFGTAHQAQSTHGVIKFPAPVAAGGFLPMAELDALAQAALDA | 180 Oropharyngeal_swab    | PAIPLLAIVAGSVKSTKLELANLVKRVQDLVGGGINTFIAAAGYVKGSLYEPDLLD |
| Mouth                 | DEALSXKYAALCDVFNDAFGTAHQAQSTHGVIKFPAPVAAGGFLPMAELDALAQAALDA | 180 Mouth                 | PAIPLLAIVAGSVKSTKLELANLVKRVQDLVGGGINTFIAAAGYVKGSLYEPDLLD |
| Lung_cystic_fibrosisC | DEALSXKYAALCDVFNDAFGTAHQAQSTHGVIKFPAPVAAGGFLPMAELDALAQAALDA | 180 Lung_cystic_fibrosisC | PAIPLLAIVAGSVKSTKLELANLVKRVQDLVGGGINTFIAAAGYVKGSLYEPDLLD |
| Lung_cystic_fibrosisB | DEALSXKYAALCDVFNDAFGTAHQAQSTHGVIKFPAPVAAGGFLPMAELDALAQAALDA | 180 Lung_cystic_fibrosisB | PAIPLLAIVAGSVKSTKLELANLVKRVQDLVGGGINTFIAAAGYVKGSLYEPDLLD |
| Lung3                 | DEALSXKYAALCDVFNDAFGTAHQAQSTHGVIKFPAPVAAGGFLPMAELDALAQAALDA | 180 Lung3                 | PAIPLLAIVAGSVKSTKLELANLVKRVQDLVGGGINTFIAAAGYVKGSLYEPDLLD |
| Lung2                 | DEALSXKYAALCDVFNDAFGTAHQAQSTHGVIKFPAPVAAGGFLPMAELDALAQAALDA | 180 Lung2                 | PAIPLLAIVAGSVKSTKLELANLVKRVQDLVGGGINTFIAAAGYVKGSLYEPDLLD |
| Lung1                 | DEALSXKYAALCDVFNDAFGTAHQAQSTHGVIKFPAPVAAGGFLPMAELDALAQAALDA | 180 Lung1                 | PAIPLLAIVAGSVKSTKLELANLVKRVQDLVGGGINTFIAAAGYVKGSLYEPDLLD |
| Liver                 | DEALSXKYAALCDVFNDAFGTAHQAQSTHGVIKFPAPVAAGGFLPMAELDALAQAALDA | 180 Liver                 | PAIPLLAIVAGSVKSTKLELANLVKRVQDLVGGGINTFIAAAGYVKGSLYEPDLLD |
| Eye                   | DEALSXKYAALCDVFNDAFGTAHQAQSTHGVIKFPAPVAAGGFLPMAELDALAQAALDA | 180 Eye                   | PAIPLLAIVAGSVKSTKLELANLVKRVQDLVGGGINTFIAAAGYVKGSLYEPDLLD |
| Dentine_caries        | DEALSXKYAALCDVFNDAFGTAHQAQSTHGVIKFPAPVAAGGFLPMAELDALAQAALDA | 180 Dentine_caries        | PAIPLLAIVAGSVKSTKLELANLVKRVQDLVGGGINTFIAAAGYVKGSLYEPDLLD |
| Cerebrospinal_fluid3  | DEALSXKYAALCDVFNDAFGTAHQAQSTHGVIKFPAPVAAGGFLPMAELDALAQAALDA | 180 Cerebrospinal_fluid3  | PAIPLLAIVAGSVKSTKLELANLVKRVQDLVGGGINTFIAAAGYVKGSLYEPDLLD |
| Cerebrospinal_fluid1  | DEALSXKYAALCDVFNDAFGTAHQAQSTHGVIKFPAPVAAGGFLPMAELDALAQAALDA | 180 Cerebrospinal_fluid1  | PAIPLLAIVAGSVKSTKLELANLVKRVQDLVGGGINTFIAAAGYVKGSLYEPDLLD |
| Catheter              | DEALSXKYAALCDVFNDAFGTAHQAQSTHGVIKFPAPVAAGGFLPMAELDALAQAALDA | 180 Catheter              | PAIPLLAIVAGSVKSTKLELANLVKRVQDLVGGGINTFIAAAGYVKGSLYEPDLLD |
| Blood3                | DEALSXKYAALCDVFNDAFGTAHQAQSTHGVIKFPAPVAAGGFLPMAELDALAQAALDA | 180 Blood3                | PAIPLLAIVAGSVKSTKLELANLVKRVQDLVGGGINTFIAAAGYVKGSLYEPDLLD |
| Blood2                | DEALSXKYAALCDVFNDAFGTAHQAQSTHGVIKFPAPVAAGGFLPMAELDALAQAALDA | 180 Blood2                | PAIPLLAIVAGSVKSTKLELANLVKRVQDLVGGGINTFIAAAGYVKGSLYEPDLLD |
| Blood1                | DEALSXKYAALCDVFNDAFGTAHQAQSTHGVIKFPAPVAAGGFLPMAELDALAQAALDA | 180 Blood1                | PAIPLLAIVAGSVKSTKLELANLVKRVQDLVGGGINTFIAAAGYVKGSLYEPDLLD |
| Acites                | DEALSXKYAALCDVFNDAFGTAHQAQSTHGVIKFPAPVAAGGFLPMAELDALAQAALDA | 180 Acites                | PAIPLLAIVAGSVKSTKLELANLVKRVQDLVGGGINTFIAAAGYVKGSLYEPDLLD |
| D457                  | DEALSXKYAALCDVFNDAFGTAHQAQSTHGVIKFPAPVAAGGFLPMAELDALAQAALDA | 180 D457                  | PAIPLLAIVAGSVKSTKLELANLVKRVQDLVGGGINTFIAAAGYVKGSLYEPDLLD |
| FOS8                  | DEALSXKYAALCDVFNDAFGTAHQAQSTHGVIKFPAPVAAGGFLPMAELDALAQAALDA | 180 FOS8                  | PAIPLLAIVAGSVKSTKLELANLVKRVQDLVGGGINTFIAAAGYVKGSLYEPDLLD |
| Cerebrospinal_fluid2  | DEALSXKYAALCDVFNDAFGTAHQAQSTHGVIKFPAPVAAGGFLPMAELDALAQAALDA | 180 Cerebrospinal_fluid2  | PAIPLLAIVAGSVKSTKLELANLVKRVQDLVGGGINTFIAAAGYVKGSLYEPDLLD |
| Decubitus ulcer       | DEALSXKYAALCDVFNDAFGTAHQAQSTHGVIKFPAPVAAGGFLPMAELDALAQAALDA | 180 Decubitus ulcer       | PAIPLLAIVAGSVKSTKLELANLVKRVQDLVGGGINTFIAAAGYVKGSLYEPDLLD |
| Lung_cystic_fibrosisA | DEALSXKYAALCDVFNDAFGTAHQAQSTHGVIKFPAPVAAGGFLPMAELDALAQAALDA | 180 Lung_cystic_fibrosisA | PAIPLLAIVAGSVKSTKLELANLVKRVQDLVGGGINTFIAAAGYVKGSLYEPDLLD |
| Rectal_swab3          | DEALSXKYAALCDVFNDAFGTAHQAQSTHGVIKFPAPVAAGGFLPMAELDALAQAALDA | 180 Rectal_swab3          | PAIPLLAIVAGSVKSTKLELANLVKRVQDLVGGGINTFIAAAGYVKGSLYEPDLLD |
| Sputum1               | DEALSXKYAALCDVFNDAFGTAHQAQSTHGVIKFPAPVAAGGFLPMAELDALAQAALDA | 180 Sputum1               | PAIPLLAIVAGSVKSTKLELANLVKRVQDLVGGGINTFIAAAGYVKGSLYEPDLLD |
| Intestine             | DEALSXKYAALCDVFNDAFGTAHQAQSTHGVIKFPAPVAAGGFLPMAELDALAQAALDA | 180 Intestine             | PAIPLLAIVAGSVKSTKLELANLVKRVQDLVGGGINTFIAAAGYVKGSLYEPDLLD |
| Gut1                  | DEALSXKYAALCDVFNDAFGTAHQAQSTHGVIKFPAPVAAGGFLPMAELDALAQAALDA | 180 Gut1                  | PAIPLLAIVAGSVKSTKLELANLVKRVQDLVGGGINTFIAAAGYVKGSLYEPDLLD |
| Gut2                  | DEALSXKYAALCDVFNDAFGTAHQAQSTHGVIKFPAPVAAGGFLPMAELDALAQAALDA | 180 Gut2                  | PAIPLLAIVAGSVKSTKLELANLVKRVQDLVGGGINTFIAAAGYVKGSLYEPDLLD |

|                       |                                                             |     |                       |                                                             |     |
|-----------------------|-------------------------------------------------------------|-----|-----------------------|-------------------------------------------------------------|-----|
| Vascular_ulcer        | TAKKIVADAKARGADIPLPVDVVTAKQFMPDAVAEVKAVDAVAEDDLILDIGPQTAQA  | 300 | Vascular_ulcer        | OLIGKAGTVVWNGPVGVFEFAFSKGTEALARAIASSPAFSIAGGGDTLAAVDKFDIAGQ | 360 |
| Urine3                | TAKKIVADAKARGADIPLPVDVVTAKQFLPDAAEVVKAVDAVAEDDLILDIGPQTAQA  | 300 | Urine3                | OLIEKAGTVVWNGPVGVFEFAFSKGTEALARAIASSKAFSIAGGGDTLAAVDKFDIAGQ | 360 |
| Urine2                | TAKKIVADAKARGADIPLPVDVVTAKQFMPDAVAEVVKAVDAVAEDDLILDIGPQTAQA | 300 | Urine2                | QLIKAGTVVWNGPVGVFEFAFSKGTEALARAIASSKAFSIAGGGDTLAAVDKFDIAGQ  | 360 |
| Urine1                | TAKKIVADAKARGADIPLPVDVVTAKQFMPDAAEVVKAVDAVAEDDLILDIGPQTAQA  | 300 | Urine1                | OLIGKAGTVVWNGPVGVFEFAFSKGTEALARAIASSPAFSIAGGGDTLAAVDKFDIAGQ | 360 |
| Throat(pharynx)       | TAKKIVADAKARGADIPLPVDVVTAKQFMPDAVAEVVKAVDAVAEDDLILDIGPQTAQA | 300 | Throat(pharynx)       | OLIEKAGTVVWNGPVGVFEFAFSKGTEALARAIASSKAFSIAGGGDTLAAVDKFDIAGQ | 360 |
| Thracheal_aspirate    | TAKKIVADAKARGADIPLPVDVVTAKQFMPDAVAEVVKAVDAVAEDDLILDIGPQTAQA | 300 | Thracheal_aspirate    | OLIEKAGTVVWNGPVGVFEFAFSKGTEALARAIASSKAFSIAGGGDTLAAVDKFDIAGQ | 360 |
| Sputum3               | TAKKIVADAKARGADIPLPVDVVTAKQFMPDAVAEVVKAVDAVAEDDLILDIGPQTAQA | 300 | Sputum3               | OLIDKAGTVVWNGPVGVFEFAFSKGTEALARAIASSKAFSIAGGGDTLAAVDKFDIAGQ | 360 |
| Sputum2               | TAKKIVADAKARGADIPLPVDVVTAKQFMPDAVAEVVKAVDAVAEDDLILDIGPQTAQA | 300 | Sputum2               | OLIEKAGTVVWNGPVGVFEFAFSKGTEALARAIASSKAFSIAGGGDTLAAVDKFDIAGQ | 360 |
| Rectal_swab2          | TAKKIVADAKARGADIPLPVDVVTAKQFMPDAVAEVVKAVDAVAEDDLILDIGPQTAQA | 300 | Rectal_swab2          | OLIEKAGTVVWNGPVGVFEFAFSKGTEALARAIASSPAFSIAGGGDTLAAVDKFDIAGQ | 360 |
| Rectal_swab1          | TAKKIVADAKARGADIPLPVDVVTAKQFLPDAAEVVKAVDAVAEDDLILDIGPQTAQA  | 300 | Rectal_swab1          | OLIEKAGTVVWNGPVGVFEFAFSKGTEALARAIASSKAFSIAGGGDTLAAVDKFDIAGQ | 360 |
| Pus2                  | TAKKIVADAKARGADIPLPVDVVTAKQFMPDAVAEVVKAVDAVAEDDLILDIGPQTAQA | 300 | Pus2                  | QLIEKAGTVVWNGPVGVFEFAFSKGTEALARAIASSKAFSIAGGGDTLAAVDKFDIAGQ | 360 |
| Pus1                  | TAKKIVADAKARGADIPLPVDVVTAKQFLPDAAEVVKAVDAVAEDDLILDIGPQTAQA  | 246 | Pus1                  | OLIEKAGTVVWNGPVGVFEFAFSKGTEALARAIASSKAFSIAGGGDTLAAVDKFDIAGQ | 306 |
| Perineum              | TAKKIVADAKARGADIPLPVDVVTAKQFMPDAVAEVVKAVDAVAEDDLILDIGPQTAQA | 300 | Perineum              | QLIEKAGTVVWNGPVGVFEFAFSKGTEALARAIASSKAFSIAGGGDTLAAVDKFDIAGQ | 360 |
| Oropharynx            | TAKKIVADAKARGADIPLPVDVVTAKQFMPDAVAEVVKAVDAVAEDDLILDIGPQTAQA | 300 | Oropharynx            | QLIDKAGTVVWNGPVGVFEFAFSKGTEALARAIASSPAFSIAGGGDTLAAVDKFDIAGQ | 360 |
| Oropharyngeal_swab    | TAKKIVADAKARGADIPLPVDVVTAKQFMPDAVAEVVKAVDAVAEDDLILDIGPQTAQA | 300 | Oropharyngeal_swab    | QLIEKAGTVVWNGPVGVFEFAFSKGTEALARAIASSKAFSIAGGGDTLAAVDKFDIAGQ | 360 |
| Mouth                 | TAKKIVADAKARGADIPLPVDVVTAKQFMPDAVAEVVKAVDAVAEDDLILDIGPQTAQA | 300 | Mouth                 | QLIDKAGTVVWNGPVGVFEFAFSKGTEALARAIASSKAFSIAGGGDTLAAVDKFDIAGQ | 360 |
| Lung_cystic_fibrosisC | TAKKIVADAKARGADIPLPVDVVTAKQFMPDAVAEVVKAVDAVAEDDLILDIGPQTAQA | 300 | Lung_cystic_fibrosisC | QLIEKAGTVVWNGPVGVFEFAFSKGTEALARAIASSKAFSIAGGGDTLAAVDKFDIAGQ | 360 |
| Lung_cystic_fibrosisB | TAKKIVADAKARGADIPLPVDVVTAKQFLPDAAEVVKAVDAVAEDDLILDIGPQTAQA  | 300 | Lung_cystic_fibrosisB | OLIEKAGTVVWNGPVGVFEFAFSKGTEALARAIASSKAFSIAGGGDTLAAVDKFDIAGQ | 360 |
| Lung3                 | TAKKIVADAKARGADIPLPVDVVTAKQFMPDAVAEVVKAVDAVAEDDLILDIGPQTAQA | 300 | Lung3                 | QLIEKAGTVVWNGPVGVFEFAFSKGTEALARAIASSKAFSIAGGGDTLAAVDKFDIAGQ | 360 |
| Lung2                 | TAKKIVADAKARGADIPLPVDVVTAKQFMPDAVAEVVKAVDAVAEDDLILDIGPQTAQA | 300 | Lung2                 | OLIEKAGTVVWNGPVGVFEFAFSKGTEALARAIASSKAFSIAGGGDTLAAVDKFDIAGQ | 360 |
| Lung1                 | TAKKIVADAKARGADIPLPVDVVTAKQFMPDAVAEVVKAVDAVAEDDLILDIGPQTAQA | 300 | Lung1                 | QLIEKAGTVVWNGPVGVFEFAFSKGTEALARAIASSKAFSIAGGGDTLAAVDKFDIAGQ | 360 |
| Liver                 | TAKKIVADAKARGADIPLPVDVVTAKQFLPDAAEVVKAVDAVAEDDLILDIGPQTAQA  | 300 | Liver                 | OLIEKAGTVVWNGPVGVFEFAFSKGTEALARAIASSPAFSIAGGGDTLAAVDKFDIAGQ | 360 |
| Eye                   | TAKKIVADAKARGADIPLPVDVVTAKQFMPDAVAEVVKAVDAVAEDDLILDIGPQTAQA | 300 | Eye                   | QLIEKAGTVVWNGPVGVFEFAFSKGTEALARAIASSKAFSIAGGGDTLAAVDKFDIAGQ | 360 |
| Dentine_caries        | TAKKIVADAKARGADIPLPVDVVTAKQFMPDAVAEVVKAVDAVAEDDLILDIGPQTAQA | 300 | Dentine_caries        | OLIEKAGTVVWNGPVGVFEFAFSKGTEALARAIASSPAFSIAGGGDTLAAVDKFDIAGQ | 360 |
| Cerebrospinal_fluid3  | TAKKIVADAKARGADIPLPVDVVTAKQFMPDAVAEVVKAVDAVAEDDLILDIGPQTAQA | 300 | Cerebrospinal_fluid3  | OLIEKAGTVVWNGPVGVFEFAFSKGTEALARAIASSKAFSIAGGGDTLAAVDKFDIAGQ | 360 |
| Cerebrospinal_fluid1  | TAKKIVADAKARGADIPLPVDVVTAKQFMPDAVAEVVKAVDAVAEDDLILDIGPQTAQA | 300 | Cerebrospinal_fluid1  | OLIEKAGTVVWNGPVGVFEFAFSKGTEALARAIASSPAFSIAGGGDTLAAVDKFDIAGQ | 360 |
| Catheter              | TAKKIVADAKARGADIPLPVDVVTAKQFLPDAAEVVKAVDAVAEDDLILDIGPQTAQA  | 300 | Catheter              | OLIEKAGTVVWNGPVGVFEFAFSKGTEALARAIASSKAFSIAGGGDTLAAVDKFDIAGQ | 360 |
| Blood3                | TAKKIVADAKARGADIPLPVDVVTAKQFMPDAVAEVVKAVDAVAEDDLILDIGPQTAQA | 300 | Blood3                | OLIDKAGTVVWNGPVGVFEFAFSKGTEALARAIASSKAFSIAGGGDTLAAVDKFDIAGQ | 360 |
| Blood2                | TAKKIVADAKARGADIPLPVDVVTAKQFMPDAVAEVVKAVDAVAEDDLILDIGPQTAQA | 300 | Blood2                | OLIEKAGTVVWNGPVGVFEFAFSKGTEALARAIASSPAFSIAGGGDTLAAVDKFDIAGQ | 360 |
| Blood1                | TAKKIVADAKARGADIPLPVDVVTAKQFLPDAAEVVKAVDAVAEDDLILDIGPQTAQA  | 300 | Blood1                | OLIEKAGTVVWNGPVGVFEFAFSKGTEALARAIASSKAFSIAGGGDTLAAVDKFDIAGQ | 360 |
| Acites                | TAKKIVADAKARGADIPLPVDVVTAKQFMPDAVAEVVKAVDAVAEDDLILDIGPQTAQA | 300 | Acites                | OLIEKAGTVVWNGPVGVFEFAFSKGTEALARAIASSKAFSIAGGGDTLAAVDKFDIAGQ | 360 |
| D457                  | TAKKIVADAKARGADIPLPVDVVTAKQFMPDAVAEVVKAVDAVAEDDLILDIGPQTAQA | 300 | D457                  | QLIEKAGTVVWNGPVGVFEFAFSKGTEALARAIASSPAFSIAGGGDTLAAVDKFDIAGQ | 360 |
| PO88                  |                                                             | 50  | PO88                  |                                                             | 50  |
| Cerebrospinal_fluid2  | TAKKIVADAKARGADIPLPVDVVTAKQFMPDAVAEVVKAVDAVAEDDLILDIGPQTAQA | 300 | Cerebrospinal_fluid2  | OLIEKAGTVVWNGPVGVFEFAFSKGTEALARAIASSPAFSIAGGGDTLAAVDKFDIAGQ | 360 |
| Decubitus_ulcer       | TAKKIVADAKARGADIPLPVDVVTAKQFMPDAVAEVVKAVDAVAEDDLILDIGPQTAQA | 300 | Decubitus_ulcer       | QLIEKAGTVVWNGPVGVFEFAFSKGTEALARAIASSPAFSIAGGGDTLAAVDKFDIAGQ | 360 |
| Lung_cystic_fibrosisA | TAKKIVADAKARGADIPLPVDVVTAKQFMPDAVAEVVKAVDAVAEDDLILDIGPQTAQA | 300 | Lung_cystic_fibrosisA | QLIEKAGTVVWNGPVGVFEFAFSKGTEALARAIASSPAFSIAGGGDTLAAVDKFDIAGQ | 360 |
| Rectal_swab3          | TAKKIVADAKARGADIPLPVDVVTAKQFMPDAVAEVVKAVDAVAEDDLILDIGPQTAQA | 300 | Rectal_swab3          | OLIEKAGTVVWNGPVGVFEFAFSKGTEALARAIASSPAFSIAGGGDTLAAVDKFDIAGQ | 360 |
| Sputum1               | TAKKIVADAKARGADIPLPVDVVTAKQFLPDAAEVVKAVDAVAEDDLILDIGPQTAQA  | 300 | Sputum1               | GLIAKAGTVVWNGPVGVFEFAFSHGTEALARAIASSPAFSIAGGGDTLAAVDKFDIAGQ | 360 |
| Intestine             | TAKKIVADAKARGADIPLPVDVVTAKQFLPDAAEVVKAVDAVAEDDLILDIGPQTAQA  | 300 | Intestine             | GLIAKAGTVVWNGPVGVFEFAFSHGTEALARAIASSPAFSIAGGGDTLAAVDKFDIAGQ | 360 |
| Gut1                  | TAKKIVADAKARGADIPLPVDVVTAKQFLPDAAEVVKAVDAVAEDDLILDIGPQTAQA  | 300 | Gut1                  | GLIAKAGTVVWNGPVGVFEFAFSHGTEALARAIASSPAFSIAGGGDTLAAVDKFDIAGQ | 360 |
| Gut2                  | TAKKIVADAKARGADIPLPVDVVTAKQFLPDAAEVVKAVDAVAEDDLILDIGPQTAQA  | 300 | Gut2                  | GLIAKAGTVVWNGPVGVFEFAFSHGTEALARAIASSPAFSIAGGGDTLAAVDKFDIAGQ | 360 |
| Vascular_ulcer        | VSISTGGGAFLEFLEGN*TLPAVAALDA                                | 391 |                       |                                                             |     |
| Urine3                | VSISTGGGAFLEFLEGN*TLPAVAALDA                                | 391 |                       |                                                             |     |
| Urine2                | VSISTGGGAFLEFLEGN*TLPAVAALDA                                | 391 |                       |                                                             |     |
| Urine1                | VSISTGGGAFLEFLEGN*TLPAVAALDA                                | 391 |                       |                                                             |     |
| Throat(pharynx)       | VSISTGGGAFLEFLEGN*TLPAVAALDA                                | 391 |                       |                                                             |     |
| Thracheal_aspirate    | VSISTGGGAFLEFLEGN*TLPAVAALDA                                | 391 |                       |                                                             |     |
| Sputum3               | VSISTGGGAFLEFLEGN*TLPAVAALDA                                | 391 |                       |                                                             |     |
| Sputum2               | VSISTGGGAFLEFLEGN*TLPAVAALDA                                | 391 |                       |                                                             |     |
| Rectal_swab2          | VSISTGGGAFLEFLEGN*TLPAVAALDA                                | 391 |                       |                                                             |     |
| Rectal_swab1          | VSISTGGGAFLEFLEGN*TLPAVAALDA                                | 391 |                       |                                                             |     |
| Pus2                  | VSISTGGGAFLEFLEGN*TLPAVAALDA                                | 391 |                       |                                                             |     |
| Pus1                  | VSISTGGGAFLEFLE-----                                        | 392 |                       |                                                             |     |
| Perineum              | VSISTGGGAFLEFLEGN*TLPAVAALDA                                | 391 |                       |                                                             |     |
| Oropharynx            | VSISTGGGAFLEFLEGN*TLPAVAALDA                                | 391 |                       |                                                             |     |
| Oropharyngeal_swab    | VSISTGGGAFLEFLEGN*TLPAVAALDA                                | 391 |                       |                                                             |     |
| Mouth                 | VSISTGGGAFLEFLEGN*TLPAVAALDA                                | 391 |                       |                                                             |     |
| Lung_cystic_fibrosisC | VSISTGGGAFLEFLEGN*TLPAVAALDA                                | 391 |                       |                                                             |     |
| Lung_cystic_fibrosisB | VSISTGGGAFLEFLEGN*TLPAVAALDA                                | 391 |                       |                                                             |     |
| Lung3                 | VSISTGGGAFLEFLEGN*TLPAVAALDA                                | 391 |                       |                                                             |     |
| Lung2                 | VSISTGGGAFLEFLEGN*TLPAVAALDA                                | 391 |                       |                                                             |     |
| Lung1                 | VSISTGGGAFLEFLEGN*TLPAVAALDA                                | 391 |                       |                                                             |     |
| Liver                 | VSISTGGGAFLEFLEGN*TLPAVAALDA                                | 391 |                       |                                                             |     |
| Eye                   | VSISTGGGAFLEFLEGN*TLPAVAALDA                                | 391 |                       |                                                             |     |
| Dentine_caries        | VSISTGGGAFLEFLEGN*TLPAVAALDA                                | 391 |                       |                                                             |     |
| Cerebrospinal_fluid3  | VSISTGGGAFLEFLEGN*TLPAVAALDA                                | 391 |                       |                                                             |     |
| Cerebrospinal_fluid1  | VSISTGGGAFLEFLEGN*TLPAVAALDA                                | 391 |                       |                                                             |     |
| Catheter              | VSISTGGGAFLEFLEGN*TLPAVAALDA                                | 391 |                       |                                                             |     |
| Blood3                | VSISTGGGAFLEFLEGN*TLPAVAALDA                                | 391 |                       |                                                             |     |
| Blood2                | VSISTGGGAFLEFLEGN*TLPAVAALDA                                | 391 |                       |                                                             |     |
| Blood1                | VSISTGGGAFLEFLEGN*TLPAVAALDA                                | 391 |                       |                                                             |     |
| Acites                | VSISTGGGAFLEFLEGN*TLPAVAALDA                                | 391 |                       |                                                             |     |
| D457                  | VSISTGGGAFLEFLEGN*TLPAVAALDA                                | 391 |                       |                                                             |     |
| PO88                  | -----                                                       | 50  |                       |                                                             |     |
| Cerebrospinal_fluid2  | VSISTGGGAFLEFLEGN*TLPAVAALDA                                | 391 |                       |                                                             |     |
| Decubitus_ulcer       | VSISTGGGAFLEFLEGN*TLPAVAALDA                                | 391 |                       |                                                             |     |
| Lung_cystic_fibrosisA | VSISTGGGAFLEFLEGN*TLPAVAALDA                                | 391 |                       |                                                             |     |
| Rectal_swab3          | VSISTGGGAFLEFLEGN*TLPAVAALDA                                | 391 |                       |                                                             |     |
| Sputum1               | VSISTGGGAFLEFLEGN*TLPAVAALDA                                | 391 |                       |                                                             |     |
| Intestine             | VSISTGGGAFLEFLEGN*TLPAVAALDA                                | 391 |                       |                                                             |     |
| Gut1                  | VSISTGGGAFLEFLEGN*TLPAVAALDA                                | 391 |                       |                                                             |     |
| Gut2                  | VSISTGGGAFLEFLEGN*TLPAVAALDA                                | 391 |                       |                                                             |     |
